# Supplementary material
Source: HighWire-hosted journal article supplement (https://jnm.snmjournals.org/highwire/filestream/94422/field_highwire_adjunct_files/0/104893_Supplemental_Data.pdf)
Supplement: 104893_Supplemental_Data.pdf [file 104893_Supplemental_Data.pdf]

**SUPPLEMENTAL TABLE 1**

Comparison between the general characteristics of the entire study cohort and of patients who received <sup>99m</sup>Tc-MDP bone scans

| Characteristic                | Entire study cohort (n=80) | Patients who received <sup>99m</sup> Tc-MDP bone scans*(n=47) | P value | Test           |
|-------------------------------|----------------------------|---------------------------------------------------------------|---------|----------------|
| Mean age ± SD (years)         | 52.3 ± 9.2                 | 53.7 ± 7.5                                                    | 0.89    | T-test         |
| Sex, n (%)                    |                            |                                                               | 0.99    | Fisher's exact |
| Male                          | 74                         | 44                                                            |         |                |
| Female                        | 6                          | 3                                                             |         |                |
| Tumor site, n (%)             |                            |                                                               | 0.57    | Fisher's exact |
| Oral cavity                   | 59                         | 37                                                            |         |                |
| Oropharynx                    | 9                          | 3                                                             |         |                |
| Hypopharynx                   | 10                         | 7                                                             |         |                |
| Larynx                        | 2                          | 0                                                             |         |                |
| Histology                     |                            |                                                               | 0.36    | Fisher's exact |
| Squamous cell carcinoma (SCC) | 78                         | 46                                                            |         |                |
| Non-SCC                       | 2                          | 1                                                             |         |                |

SD = standard deviation

\* 47 out of the 80 patients received <sup>99m</sup>Tc-MDP bone scans

**SUPPLEMENTAL TABLE 2**

Assessment of skeletal metastasis by <sup>99m</sup>Tc-MDP bone scan, <sup>18</sup>F-fluoride PET/CT, and <sup>18</sup>F-FDG PET/CT

|                                 | FN | TP | TN  | FP | Sensitivity<br>(95% CI) | Specificity<br>(95% CI) | PPV<br>(95% CI)  | NPV<br>(95% CI)  | Accuracy<br>(95% CI) |
|---------------------------------|----|----|-----|----|-------------------------|-------------------------|------------------|------------------|----------------------|
| <b>Lesion-based analysis</b>    |    |    |     |    |                         |                         |                  |                  |                      |
| <sup>99m</sup> Tc-MDP bone scan | 39 | 19 | 210 | 2  | 32.8 (21.0-46.3)        | 99.1 (96.6-99.9)        | 90.5 (69.6-98.8) | 84.3 (79.2-88.6) | 84.8 (80.0-88.9)     |
| <sup>18</sup> F-fluoride PET/CT | 13 | 45 | 210 | 2  | 77.6 (64.7-87.5)        | 99.1 (96.6-99.9)        | 95.7 (85.5-99.5) | 94.2 (90.2-96.9) | 94.4 (91.0-96.9)     |
| <sup>18</sup> F-FDG PET/CT      | 33 | 25 | 212 | 0  | 43.1 (30.2-56.8)        | 100.0                   | 100.0            | 86.5 (81.6-90.5) | 87.8 (83.3-91.4)     |
| <b>Patient-based analysis</b>   |    |    |     |    |                         |                         |                  |                  |                      |
| <sup>99m</sup> Tc-MDP bone scan | 7  | 5  | 34  | 1  | 41.7 (15.2-72.3)        | 97.1 (85.1-99.9)        | 83.3 (35.9-99.6) | 82.9 (67.9-92.8) | 83.0 (69.2-92.4)     |
| <sup>18</sup> F-fluoride PET/CT | 4  | 8  | 34  | 1  | 66.7 (34.9-90.1)        | 97.1 (85.1-99.9)        | 88.9 (51.8-99.7) | 89.5 (75.2-97.1) | 89.4 (76.9-96.5)     |
| <sup>18</sup> F-FDG PET/CT      | 4  | 8  | 35  | 0  | 66.7 (34.9-90.1)        | 100.0                   | 100.0            | 89.7 (75.8-97.1) | 91.5 (79.6-97.6)     |

FN= false negative; TP= true positive; TN= true negative; FP= false positive; PPV= positive predictive value; NPV= negative predictive value; CI= confidence interval

The lesion-based analysis in this subgroup demonstrated that the sensitivities of <sup>18</sup>F-fluoride PET/CT, <sup>18</sup>F-FDG PET/CT, and <sup>99m</sup>Tc-MDP bone scan were 77.6%, 43.1%, and 32.8%, respectively. On a patient-based analysis, the sensitivities were 66.7%, 66.7%, and 41.7%, respectively. In accordance with previous reports, the results from this subgroup showed that <sup>18</sup>F-fluoride PET/CT had a markedly higher sensitivity for the detection of bony metastases compared with MDP bone scan. The sensitivity of <sup>18</sup>F-FDG PET/CT in this subgroup was not consistent with those calculated on a patient- or lesion-based analysis. This result is likely due to the presence of fewer osteolytic lesions in this patient group, which would lead to an underestimation of the detection power of <sup>18</sup>F-FDG PET.

**SUPPLEMENTAL TABLE 3**Comparison of the Detection Rates of Skeletal Metastases by <sup>18</sup>F-FDG PET/CT and <sup>18</sup>F-fluoride PET/CT

According to the Changes in Bone Morphology on CT Scans

|                                 | Change on CT             |                      |                |                       |
|---------------------------------|--------------------------|----------------------|----------------|-----------------------|
|                                 | Osteosclerotic<br>(n=37) | Osteolytic<br>(n=13) | Mixed<br>(n=9) | Not visible<br>(n=39) |
| <sup>18</sup> F-FDG PET/CT      | 43.2 (27.1-60.5)         | 92.3 (64.0-99.8)     | 100.0          | 46.2 (30.1-62.8)      |
| <sup>18</sup> F-fluoride PET/CT | 91.9 (78.1-98.3)         | 69.2 (38.6-90.9)     | 100.0          | 38.5 (23.4-55.4)      |
| <i>P</i> value                  | 0.01                     | NS                   | NS             | NS                    |

NS = not significant

**SUPPLEMENTAL TABLE 4**

Comparison of the Detection Rates of Skeletal Metastases in Different Subgroups

|                                       | <b>Primary locoregional advanced disease (n=60)*</b> | <b>Locoregional recurrence (n=14)</b> | <b>Known M1 disease (n=6)</b> |
|---------------------------------------|------------------------------------------------------|---------------------------------------|-------------------------------|
| <b>Patients with bone metastases</b>  | 10                                                   | 2                                     | 6                             |
| <b>Bony metastasis detected by:</b>   |                                                      |                                       |                               |
| <sup>18</sup> F-fluoride PET/CT alone | 1 <sup>†</sup>                                       | 1                                     | 0                             |
| <sup>18</sup> F-FDG PET/CT alone      | 1                                                    | 0                                     | 2                             |
| Both modalities                       | 7                                                    | 0                                     | 4                             |
| Neither modality                      | 1                                                    | 1                                     | 0                             |

\* Total number of patients in each subgroup, † Number of patients with bony metastasis

**Impact on treatment and subgroup analysis:** In this study, an additional 11% (2/18) of the patients with bony metastases were revealed by <sup>18</sup>F-fluoride PET/CT alone; as a result, their treatment was changed to palliative chemotherapy. In the subgroup of patients with primary advanced locoregional disease, <sup>18</sup>F-FDG PET/CT detected bony metastases in 8 patients (Table 5). The additional <sup>18</sup>F-fluoride PET/CT scanning identified an additional case. Among the 14 patients with locoregional recurrence, two had bony metastases. None of them were detected by <sup>18</sup>F-FDG PET/CT and one was correctly diagnosed by <sup>18</sup>F-fluoride PET/CT. In the patients with known disseminated disease, all of the 6 cases with bony metastases were detected by <sup>18</sup>F-FDG PET/CT
